# Supplementary material for: The absence of SOX2 in the anterior foregut alters the esophagus into trachea and bronchi in both epithelial and mesenchymal components
Source: Oxford University Press journal article supplement (doi:10.1242/bio.048728), 2020-01-01
Supplement: bio048728supp.pdf [file bio048728supp.pdf]

# Figure S1

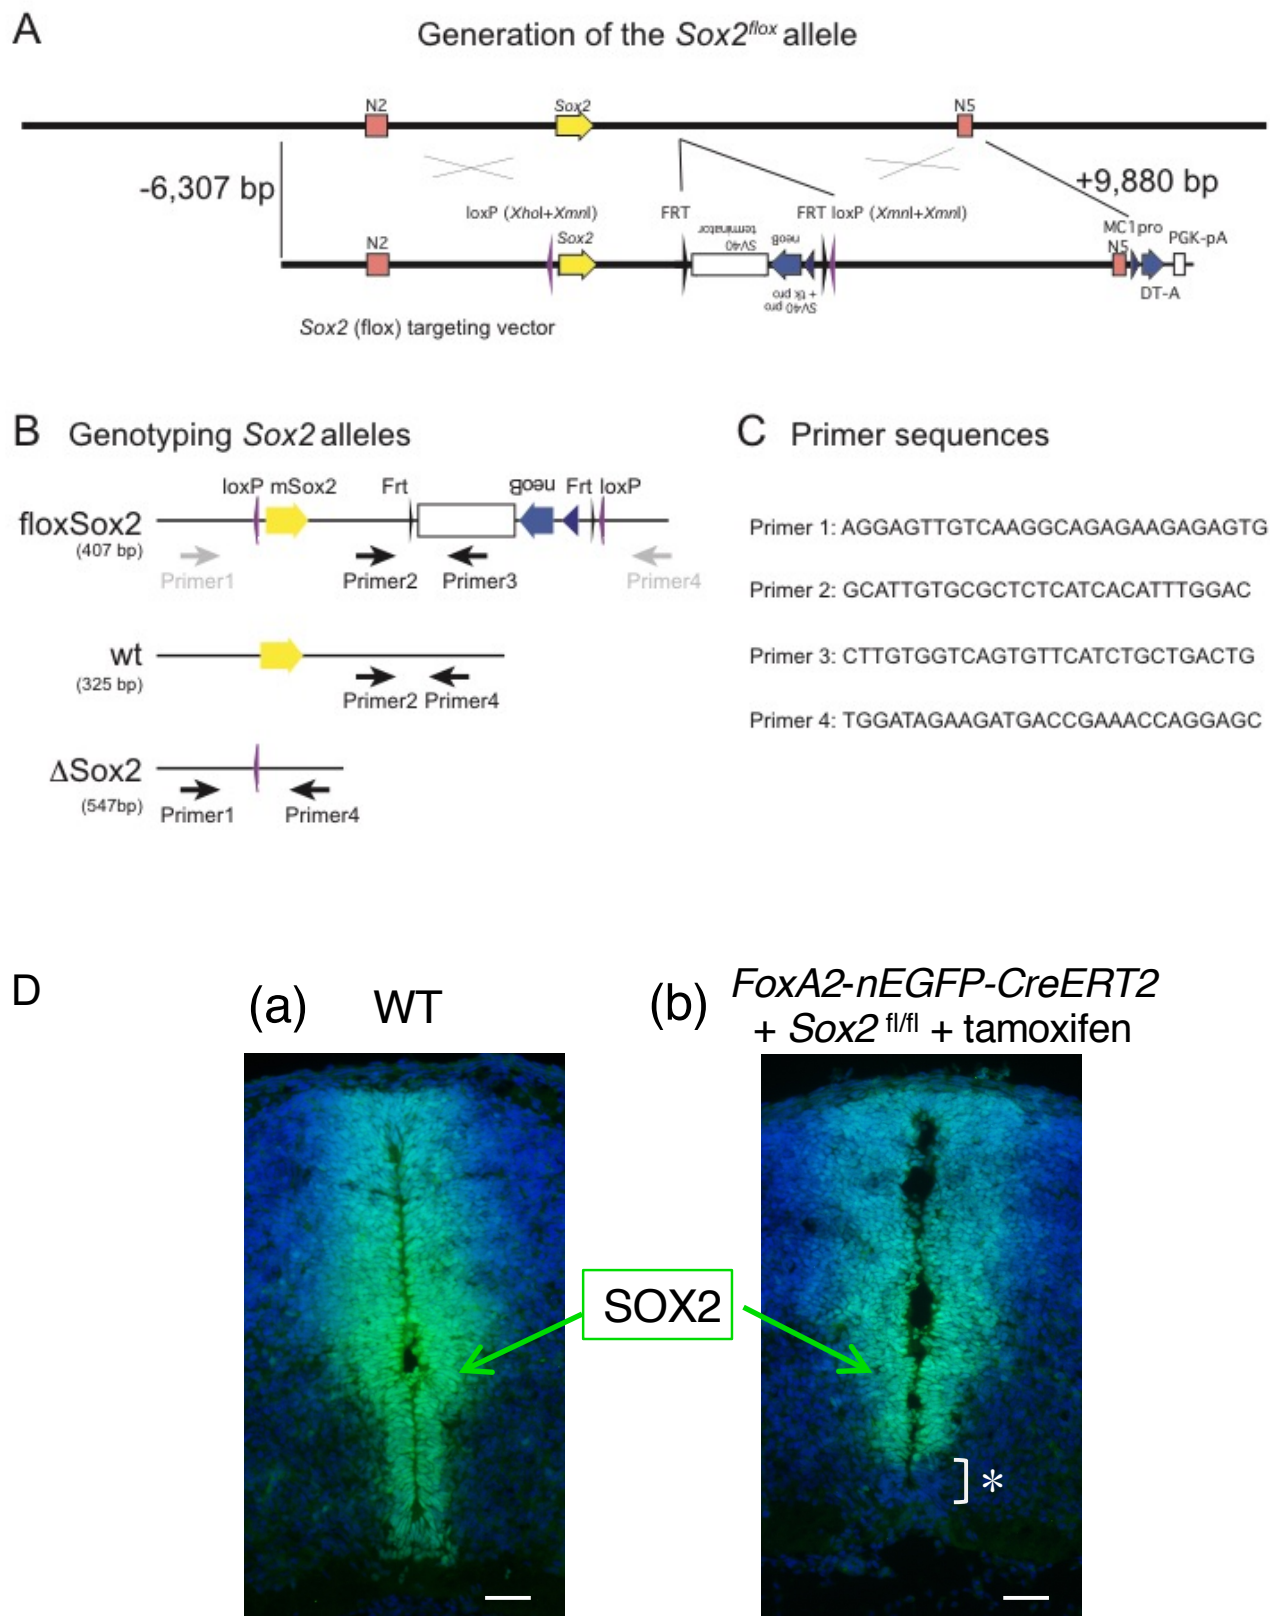

**Figure S1.** Construction and genotyping of floxed *Sox2* alleles. **(A)** A scheme of generating the floxed *Sox2* allele. A targeting vector containing the STneoB cassette (Kato et al., 1987) flanked by a pair of Flp recombinase target (FRT) was recombined with the mouse *Sox2* locus sequences in R1 ES cells (Nagy et al., 1993). **(B)** Mouse and embryo genotypes were determined using polymerase chain reaction (PCR) with primer pairs that gave PCR products of indicated sizes. Embryos carrying the homozygous floxed *Sox2* allele and the ROSA26 locus-inserted CreERT2 recombinase gene (*Gt(ROSA)26Sor<sup>tm1(cre/ERT2)Alj</sup>*) (Cheng et al., 2010) showed the  $\Delta$ *Sox2* genotype after the administration of tamoxifen to mothers on E7 and E8. **(C)** PCR primer sequences. **(D)** (a) Spinal cord of a WT embryo on E13 stained for SOX2 (green) and 4',6-diamidino-2-phenylindole (blue). (b) Spinal cord of an embryo carrying homozygous floxed *Sox2* and *FoxA2-nEGFP-CreERT2* alleles treated with tamoxifen. Weak nEGFP fluorescence was quenched by treating the fixed specimen with ethanol. Note that SOX2 immunofluorescence was lost in the floor plate-proximal ventral portion of the spinal cord, as indicated by a bracket with an asterisk. Bars, 50  $\mu$ m.

Figure S2

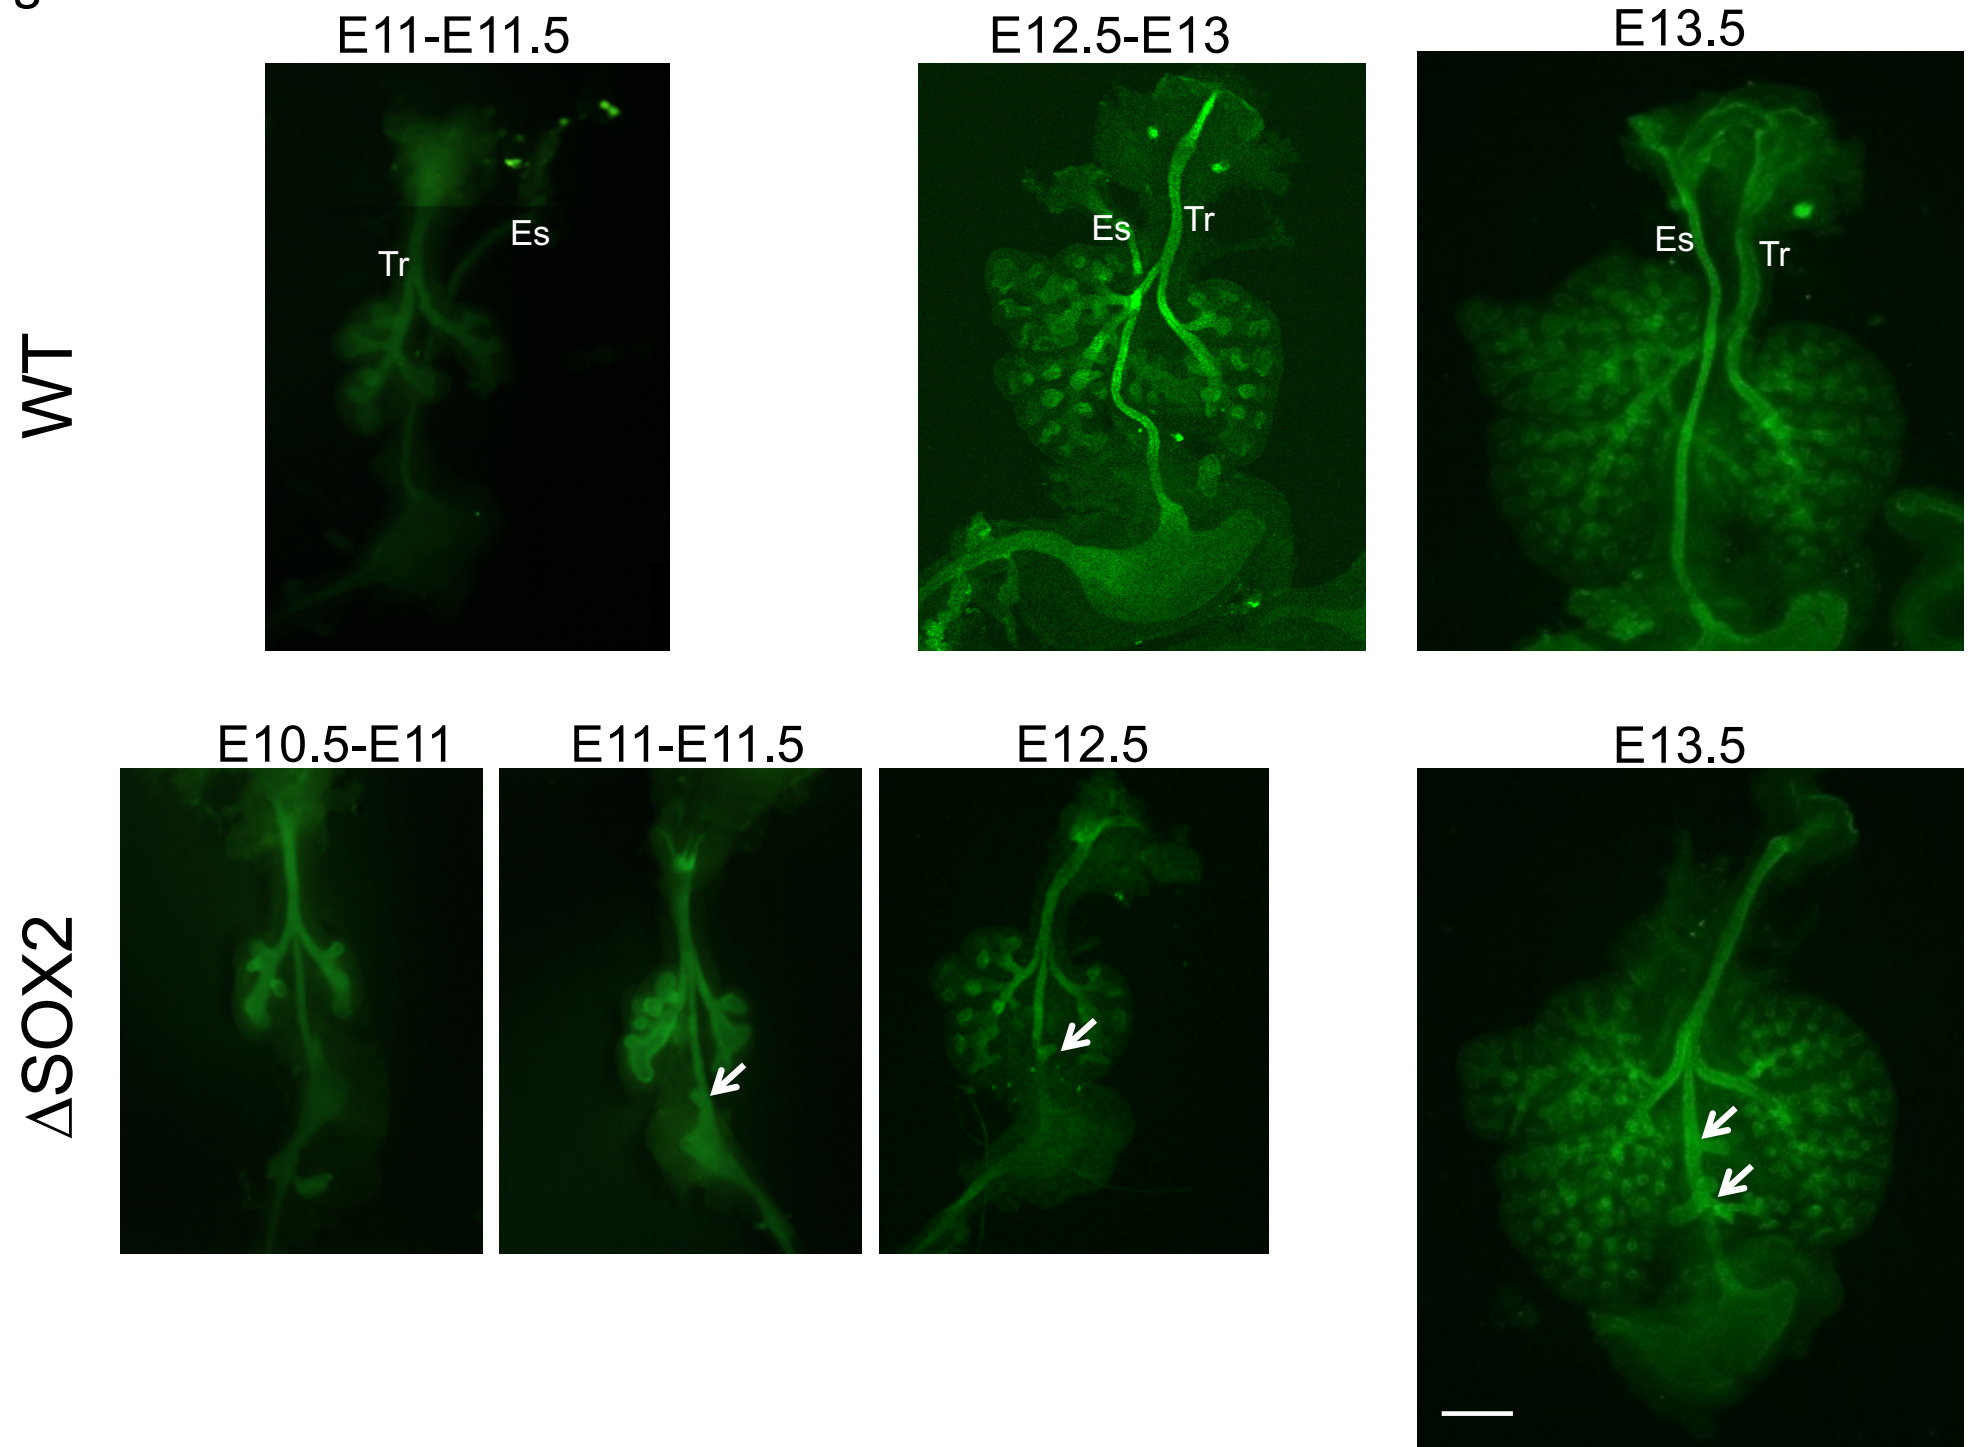

**Figure S2.** Development of lung tissues from WT and  $\Delta$ SOX2 AFG at developmental stages from E11 to E13.5. Lung tissue growth and branching patterns in  $\Delta$ SOX2 were not affected. Occasionally, bronchiole tissues budded out of  $\Delta$ SOX2 posterior AFG, as indicated by the arrows. Bar, 500  $\mu$ m.



## Figure S3

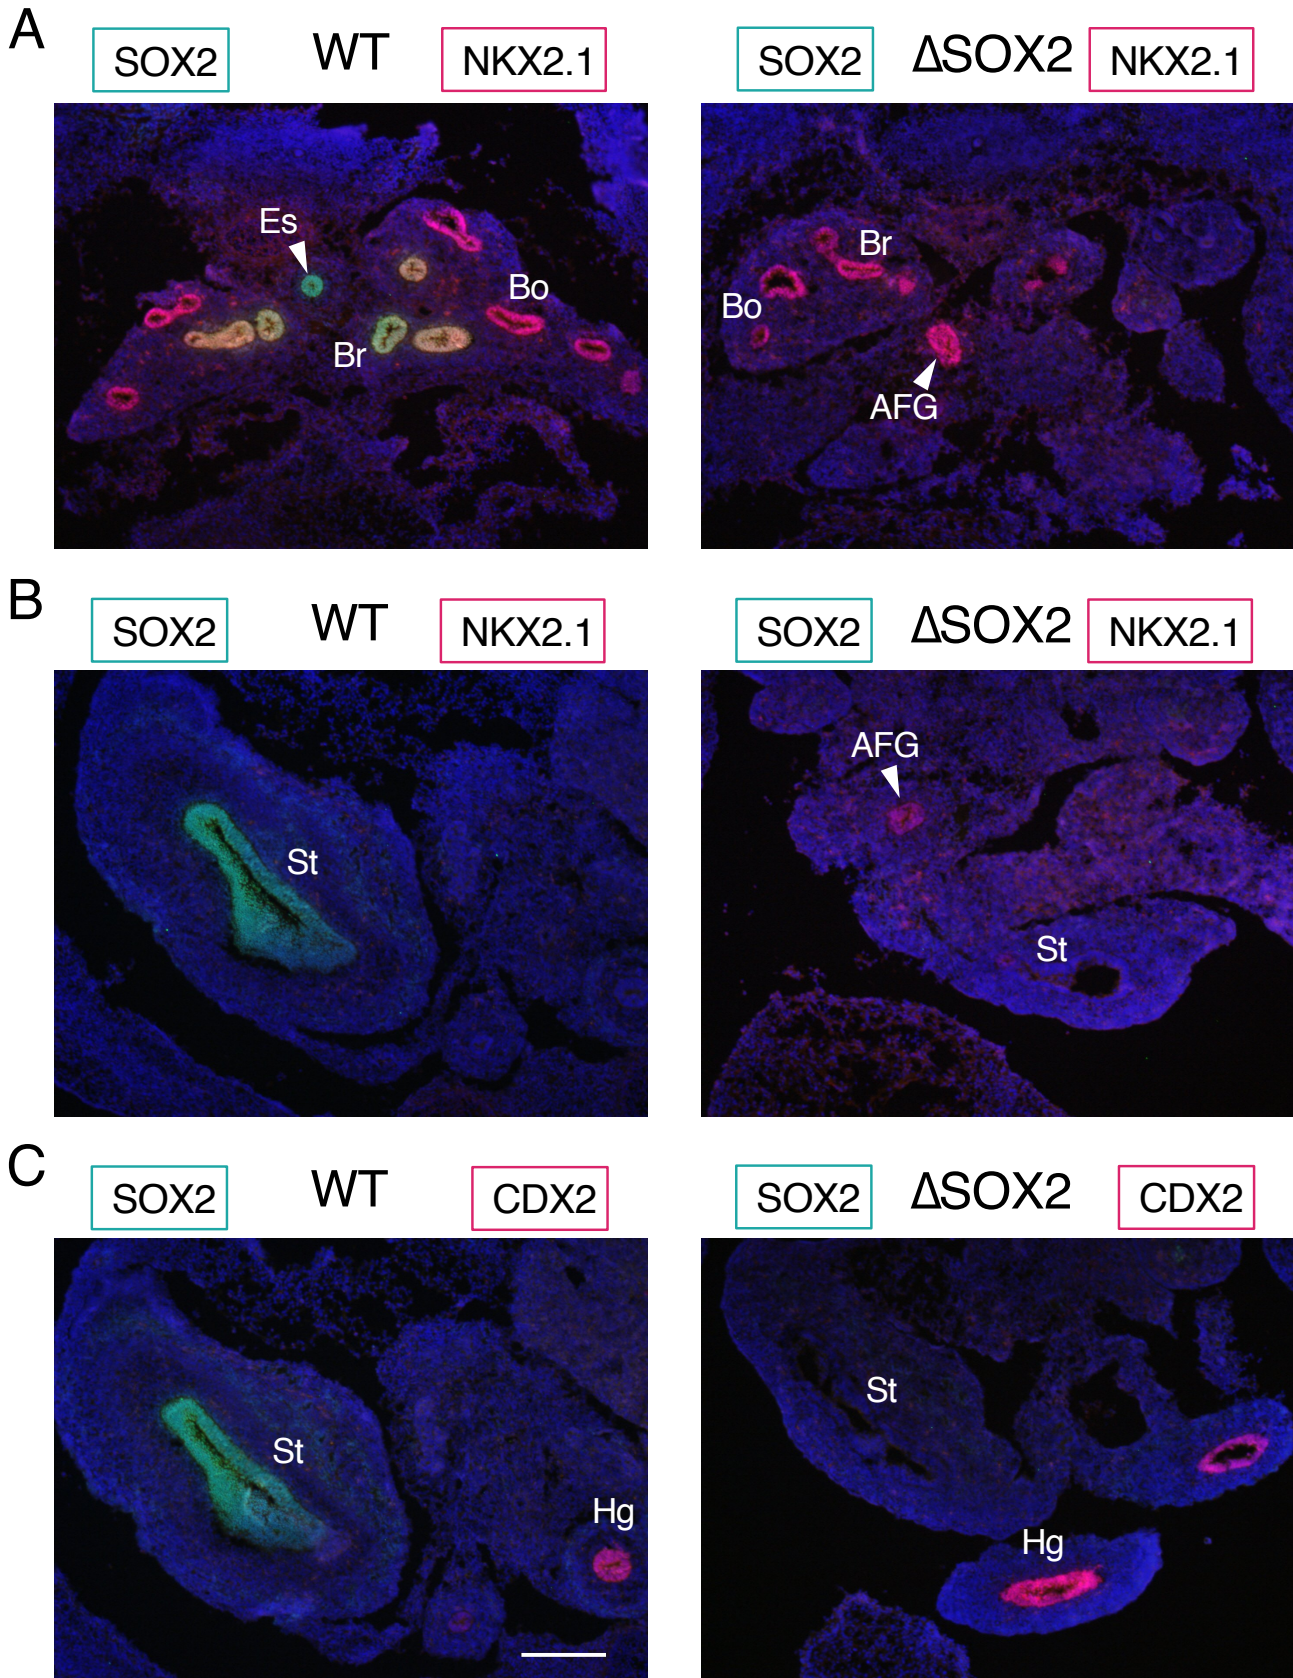

**Figure S3.** Comparison of the expression of SOX2 (green) and NKX2.1/CDX2 (red) between WT and  $\Delta$ SOX2 embryos at E13 in composite fluorescence images with DAPI (blue) (n = 3). Cryosections at lung (**A**) and stomach (**B and C**) axial levels were immunostained. Es, esophagus; Br, Bronchi; Bo, Bronchioles; AFG, AFG tube of SOX2-deficient embryo; St, stomach; Hg, hindgut. Bar, 200  $\mu$ m. (**A**) WT esophagi expressed only SOX2, and bronchi expressed various levels of SOX2 and NKX2.1, whereas bronchioles expressed only NKX2.1. By contrast, in  $\Delta$ SOX2 embryos, all endoderm-derived tubes at this level expressed NKX2.1. (**B and C**) Stomach epithelia expressed neither NKX2.1 nor CDX2 even in the absence of SOX2 expression.

**Table S1.** Antibodies and immunostaining conditions.

| Target protein                | Primary antibodies    | Supplier  | Product number | Dilution |
|-------------------------------|-----------------------|-----------|----------------|----------|
| NKX2.1                        | Mouse monoclonal IgG  | Thermo    | MS-699-P0      | 200×     |
| SOX2                          | Goat polyclonal IgG   | R&D       | AF2018         | 200×     |
| Smooth muscle $\alpha$ -actin | Mouse monoclonal IgG  | Sigma     | A2547          | 2000×    |
| SOX9                          | Rabbit polyclonal IgG | Millipore | AB5535         | 1000×    |
| CDX2                          | Mouse monoclonal IgG  | Abcam     | ab157524       | 200×     |
| GFP                           | Rabbit polyclonal IgG | MBL       | 598            | 100×     |
| E-cadherin                    | Mouse monoclonal IgG  | Abcam     | ab76055        | 500×     |

Secondary antibodies were Alexa Fluor 568 Donkey Anti-mouse IgG (Abcam, ab175700), Alexa Fluor 488 Donkey Anti-rabbit IgG (Abcam, ab150061), or Alexa Fluor 488 Donkey Anti-goat IgG (Abcam, ab150133) used at 200× dilution.

**Table S2.** Probes and *in situ* hybridization conditions.

| Target transcript | RefSeq      | Base positions | Length (bases) |
|-------------------|-------------|----------------|----------------|
| <i>Wnt4</i>       | NM_009523   | 46–1101        | 1056           |
| <i>Tbx4</i>       | NM_172798.1 | 1761–2576      | 816            |
| <i>Hoxb6</i>      | NM_008269.2 | 103–1146       | 1043           |

*In situ* hybridization of isolated internal organs was performed using digoxigenin-labeled probes and conditions described by Takemoto et al. (2011) with Proteinase K treatment at 5  $\mu$ g/ml.
